# Supplementary material for: Evidence for non-Arrhenius behavior of EPDM rubber by combining Arrhenius and time–temperature superposition (TTS) extrapolations
Source: Royal Society of Chemistry journal article supplement (doi:10.1039/d3ra07159f), 2024-01-01
Supplement: d3ra07159f1.pdf [file d3ra07159f1.pdf]

## *Supplementary*

### **Non-Arrhenius evidence of EPDM rubber by combing Arrhenius with time-temperature superposition (TTS)**

Zhiguo Cui,<sup>a</sup> Wensong Liu,<sup>b</sup> Lei Tan,<sup>a</sup> Guodong Sun<sup>a</sup> and Xiaoling Hu<sup>\*c</sup>

<sup>a</sup>. CRRC QINGDAO SIFANG CO., LTD. Qingdao 266111, China

<sup>b</sup>. Zhuzhou Times New Material Technology C., Ltd., Zhuzhou 412000, China

<sup>c</sup>. School of Mechanical Engineering and Mechanics, Xiangtan University, Xiangtan, 411105, China

\*Corresponding authors:

E-mail address:

[huxiaoling@xtu.edu.cn](mailto:huxiaoling@xtu.edu.cn) (Xiaoling Hu)

In our study, three specimens are tested under each aging condition. Thus, three repeated specimens are tested in the uniaxial tensile tests. Fig. S1 shows the stress-strain results of the uniaxial tensile tests, and each figure contains the results of the three duplicate samples.

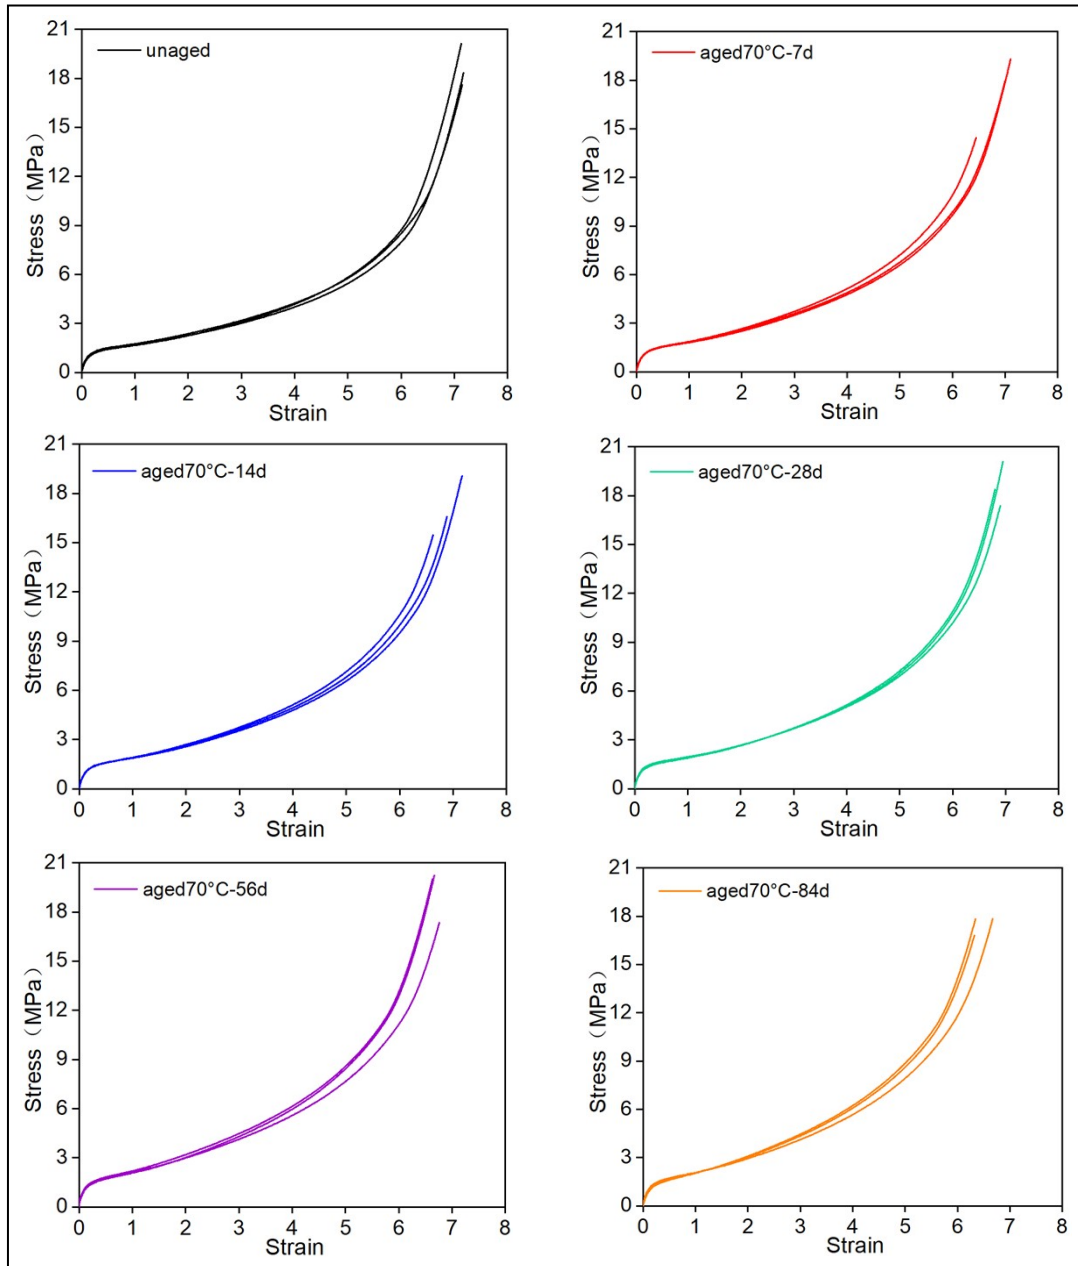

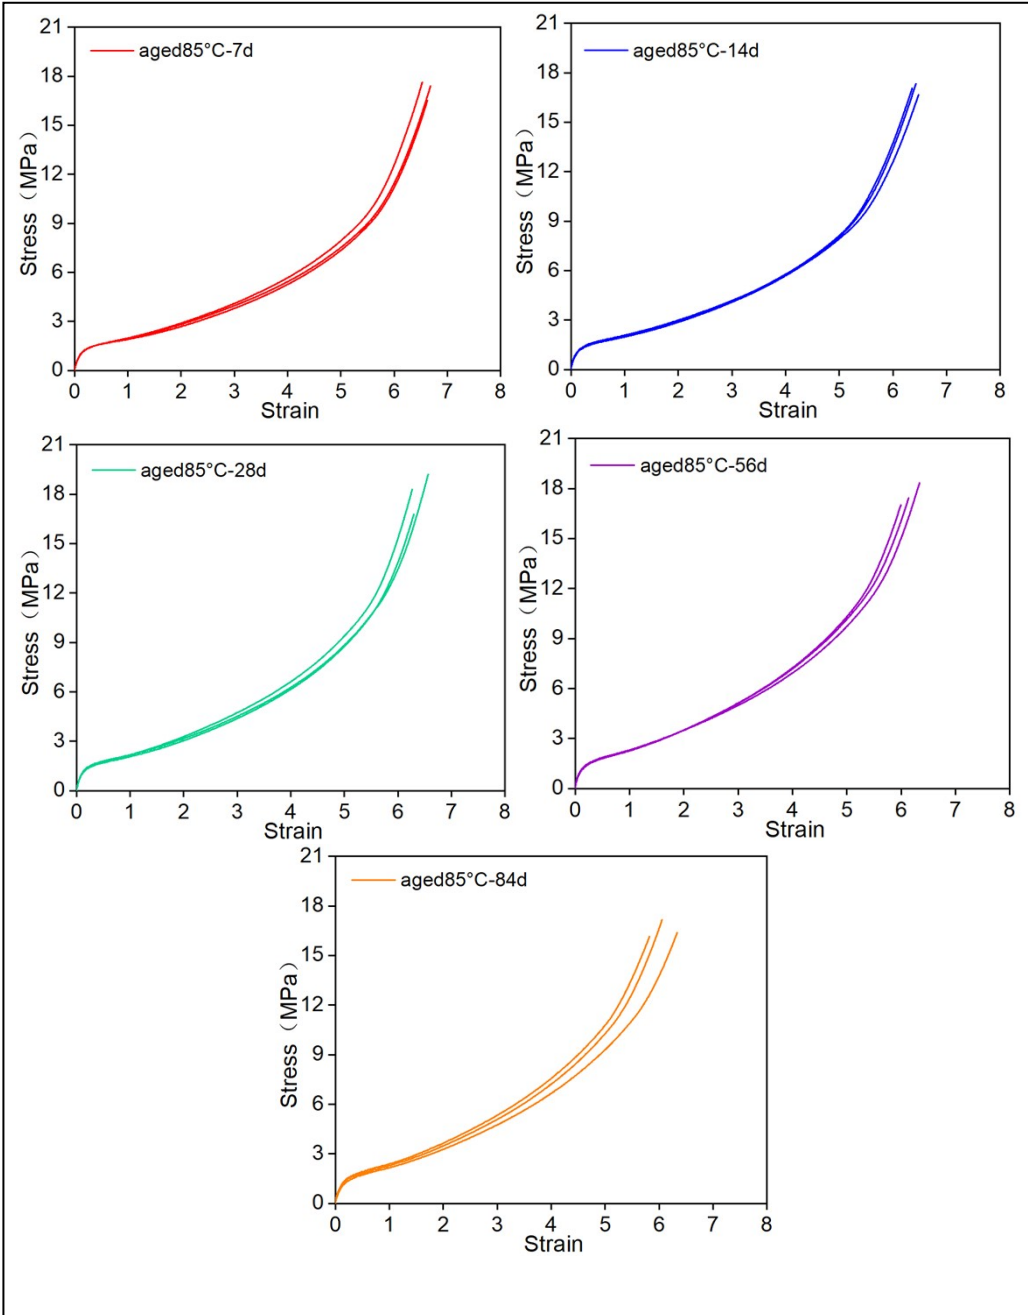

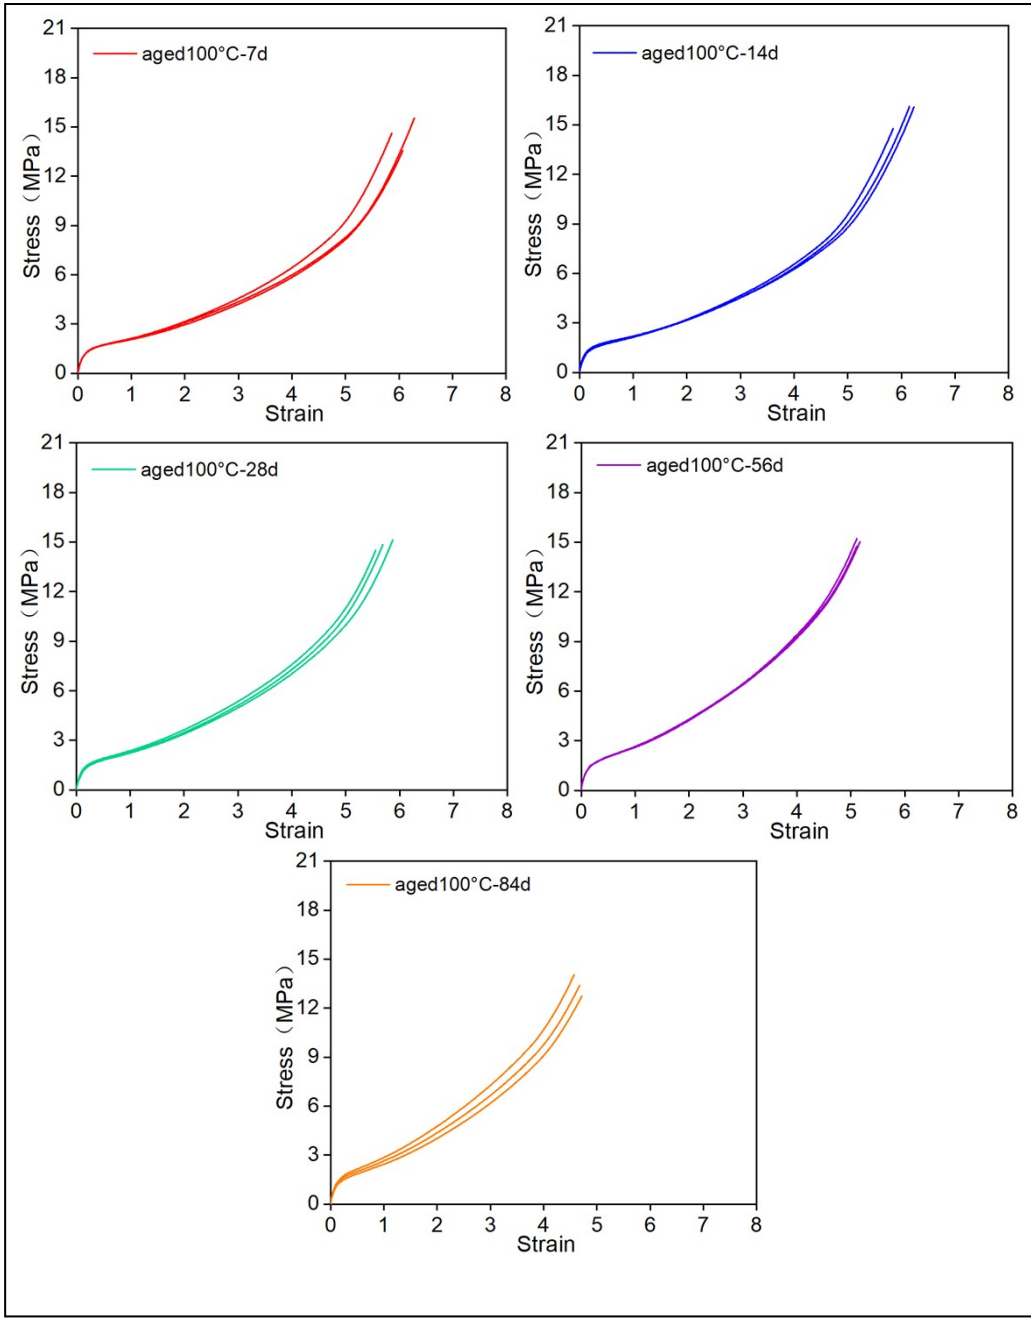

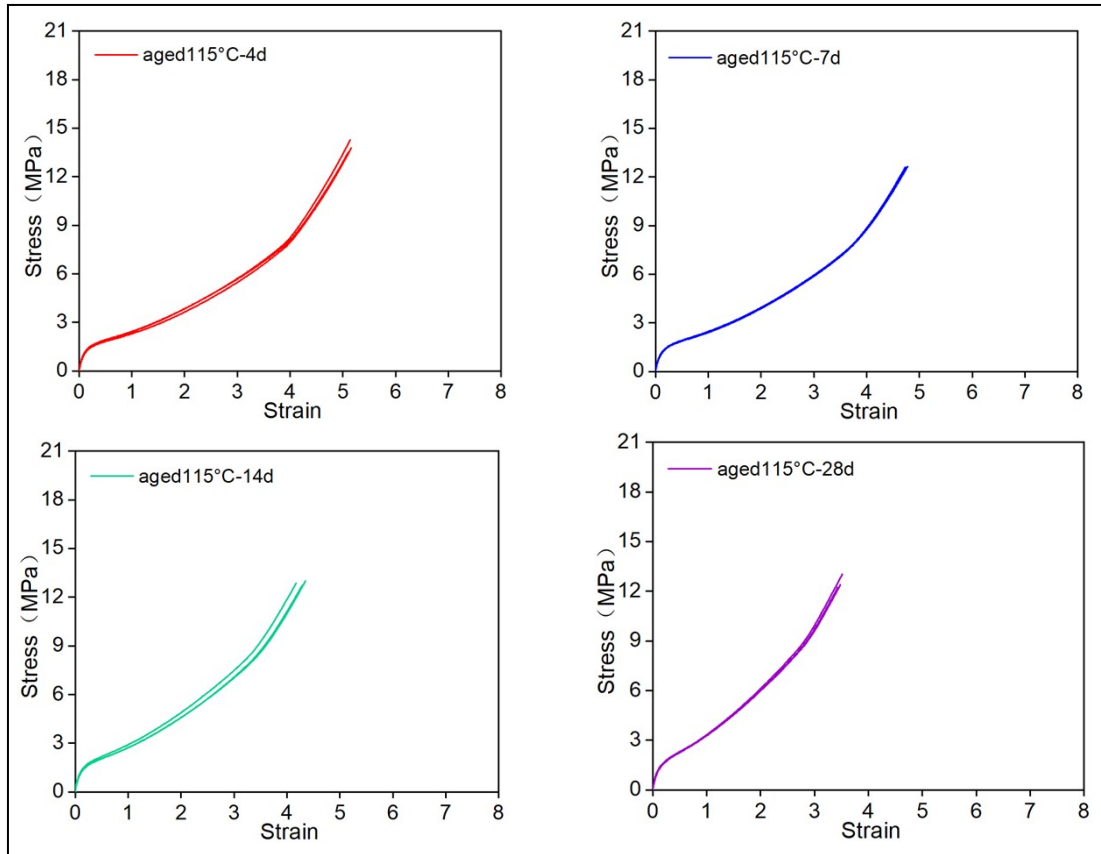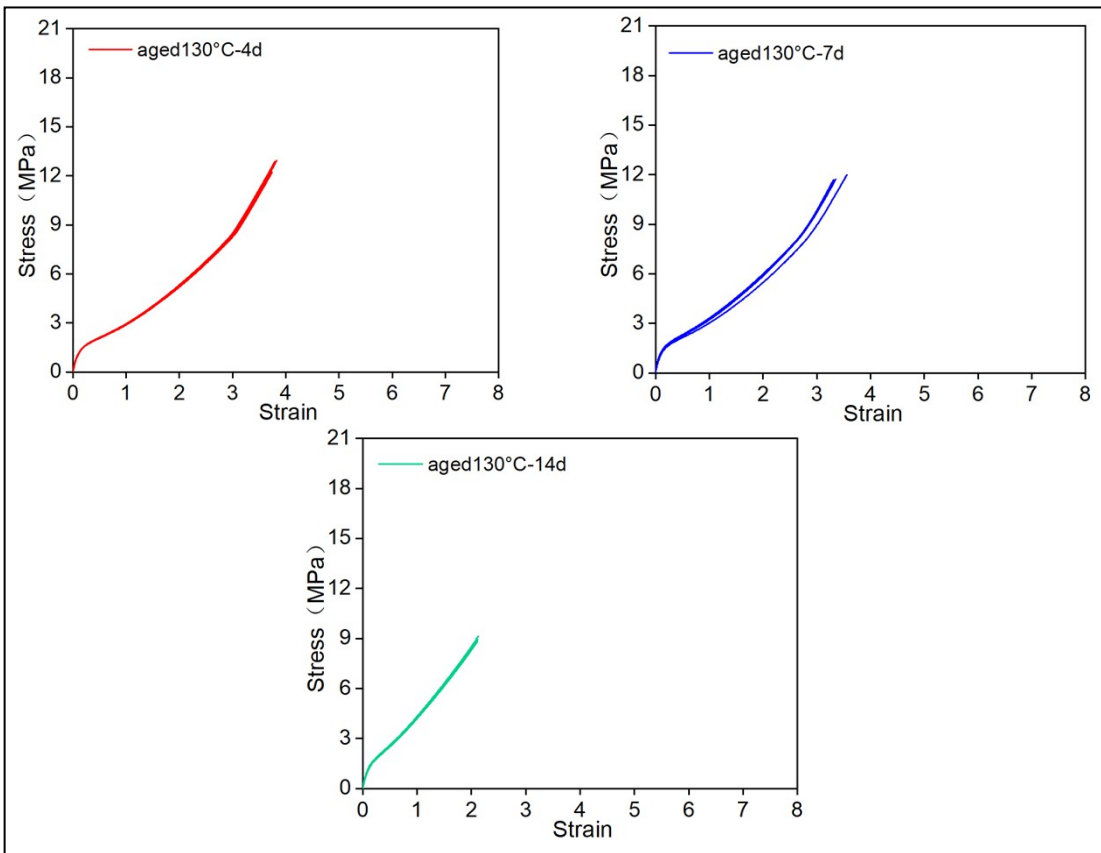

**Fig. S1** The stress-strain curves of the unaged and aged rubbers.
